# Supplementary material
Source: MDPI journal article supplement (https://www.mdpi.com/2311-5629/4/1/17)
Supplement: s1 [file s1]

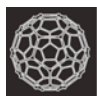

Article

# Catalytic Growth of Carbon Nanotubes by Direct Liquid Injection CVD using the Nanocluster $[H_xPMo_{12}O_{40}CH_4Mo_{72}Fe_{30}(O_2CMe)_{15}O_{254}(H_2O)_{98-y}(EtOH)_y]$

Gibran L. Esquenazi, Bruce Brinson and Andrew R. Barron

## Supplementary Materials

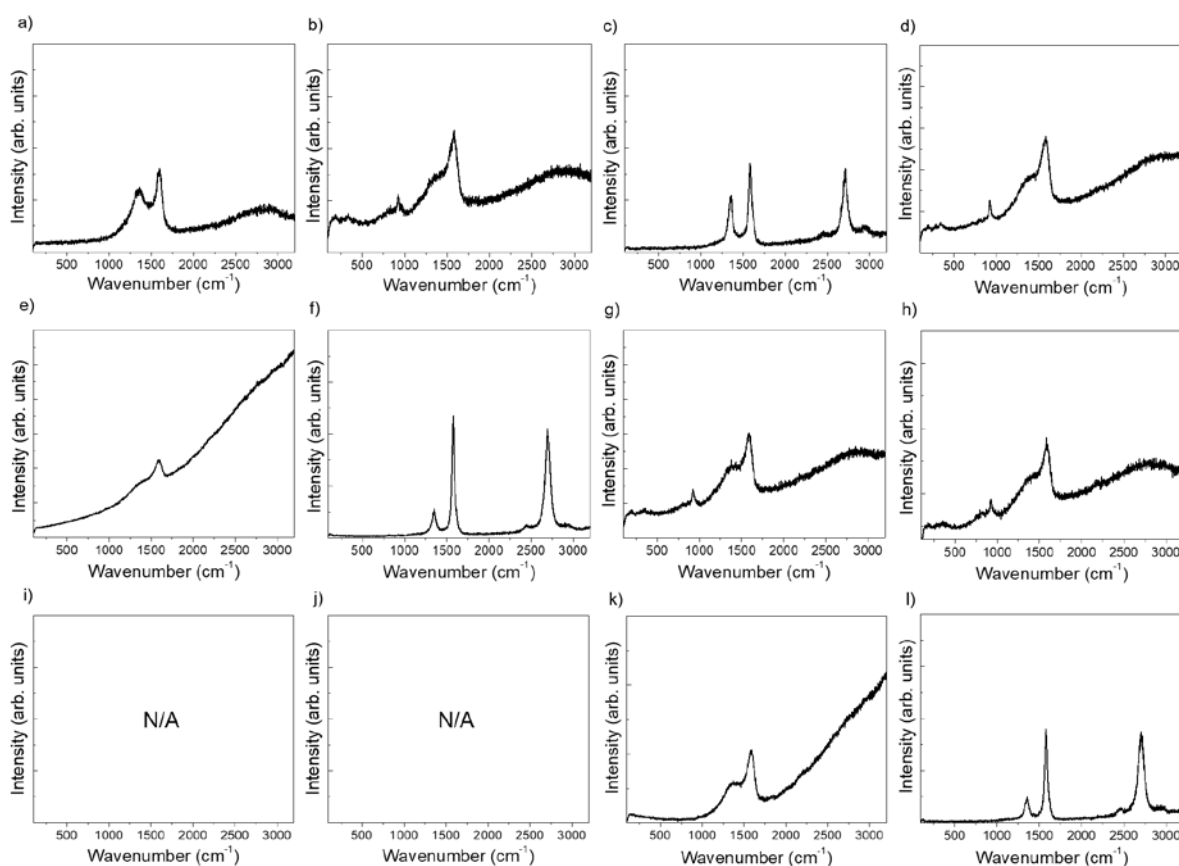

Figure S1. The Raman spectra (514.5 nm) for CNT samples grown using FeMoC as a catalyst.
